# Supplementary material
Source: ML conference proceedings conference paper supplement (https://openreview.net/forum?id=ZCpjdiNhsP)
Supplement: supplementary_material [file 14709_Norm_Bounded_Low_Rank_Ad_Supplementary Material.pdf › code/14709_Norm_Bounded_Low_Rank_Ad_Supplementary Material.pdf]

## Additional Figures

- Fig. 1 contains the training dynamics analysis for LoRA, PiSSA and NBLoRA, see the response to Reviewer SKyQ for detail discussion.
- Fig. 2 adds the norm ratio plot for each experimental setup, see the response to Reviewer SKyQ for detail discussion.
- Fig. 3 contains the training dynamics analysis for DeLoRa and NBLoRA, see the response to Reviewer smpu for detail discussion.
- Fig. 4 contains the zoom-in plots for the training dynamics of LoRA, see the response to Reviewer smpu for detail discussion.

Table 1: Fine-tuning three base models based on LoRA (Lo), DoRA (Do), PiSSA (Pi) and NB-LoRA (NB) over different learning rates ( $\{1\text{e-}5, 5\text{e-}5, 1\text{e-}4, \textcolor{blue}{2\text{e-}4}\}$  for Mistral and  $\{5\text{e-}5, 1\text{e-}4, 5\text{e-}4, \textcolor{blue}{7\text{e-}4}\}$  for LLaMA). We report the minimum, maximum and averaged test results, where the metrics for math and coding are  $\frac{1}{2}(\text{GSM8K} + \text{MATH})$  and  $\frac{1}{2}(\text{HumanEval} + \text{MBPP})$ , respectively.

| Base Model |     | Mistral-7B-v0.1 |             |      |             | LLaMA-3-8B  |      |      |             | LLaMA-2-13B |      |      |             | Model Avg. |             |      |             |
|------------|-----|-----------------|-------------|------|-------------|-------------|------|------|-------------|-------------|------|------|-------------|------------|-------------|------|-------------|
| Method     |     | Lo              | Do          | Pi   | NB          | Lo          | Do   | Pi   | NB          | Lo          | Do   | Pi   | NB          | Lo         | Do          | Pi   | NB          |
| Math       | min | 43.9            | 44.2        | 42.2 | 42.0        | 49.5        | 49.6 | 37.9 | 47.8        | 35.1        | 35.1 | 36.8 | 38.1        | 42.9       | <b>43.0</b> | 38.9 | 42.6        |
|            | max | 49.1            | 48.1        | 47.0 | 47.9        | 51.5        | 51.8 | 52.0 | 52.9        | 41.8        | 41.0 | 40.4 | 42.2        | 47.4       | 47.0        | 46.5 | <b>47.7</b> |
|            | avg | 47.2            | 46.8        | 45.4 | 46.0        | 50.5        | 50.9 | 45.6 | 50.3        | 38.9        | 38.8 | 38.7 | 40.4        | 45.5       | 45.5        | 43.2 | <b>45.6</b> |
| Code       | min | 52.4            | 53.7        | 52.9 | 53.6        | 56.3        | 56.5 | 44.4 | 57.4        | 42.5        | 42.5 | 40.1 | 44.0        | 50.4       | 50.9        | 45.8 | <b>51.7</b> |
|            | max | 57.8            | 59.2        | 59.0 | 59.7        | 63.2        | 62.6 | 63.0 | 68.1        | 46.6        | 47.2 | 45.6 | 49.4        | 55.9       | 56.4        | 55.9 | <b>59.1</b> |
|            | avg | 56.1            | 57.0        | 56.0 | 57.5        | 60.3        | 60.5 | 52.6 | 62.0        | 44.7        | 45.0 | 43.9 | 47.6        | 53.7       | 54.2        | 50.8 | <b>55.7</b> |
| Task Avg.  | min | 48.1            | <b>48.9</b> | 47.5 | 47.8        | <b>52.9</b> | 53.1 | 41.2 | 52.6        | 38.8        | 38.8 | 38.5 | <b>41.0</b> | 46.6       | 46.9        | 42.4 | <b>47.2</b> |
|            | max | 53.5            | 53.7        | 53.0 | <b>53.8</b> | 57.4        | 57.2 | 57.5 | <b>60.5</b> | 44.2        | 44.1 | 43.0 | <b>45.8</b> | 51.7       | 51.7        | 51.2 | <b>53.4</b> |
|            | avg | 51.7            | <b>51.9</b> | 50.7 | 51.8        | 55.4        | 55.7 | 49.1 | <b>56.2</b> | 41.8        | 41.9 | 41.3 | <b>44.0</b> | 49.6       | 49.8        | 47.0 | <b>50.6</b> |

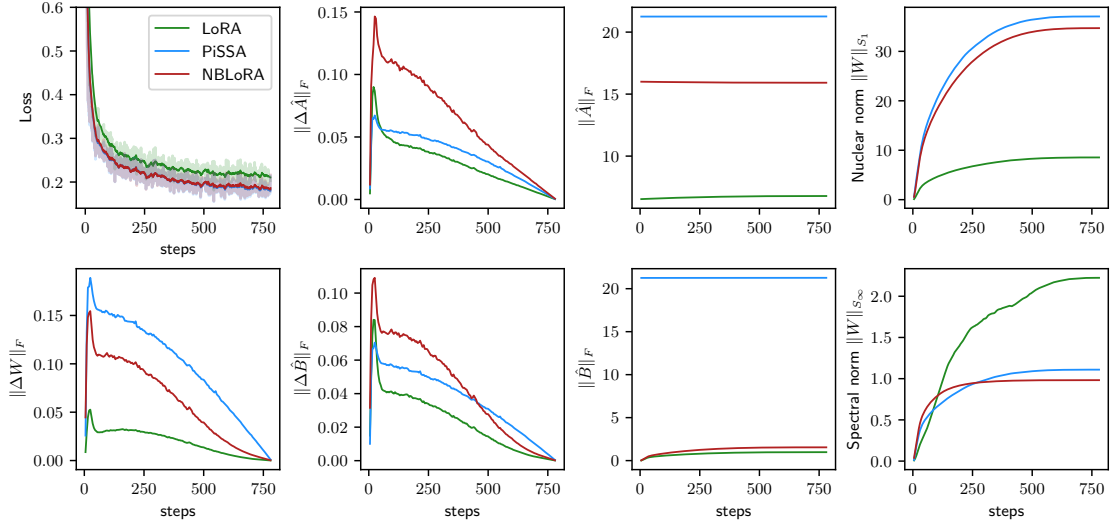

(a) Learning rate of 5e-5

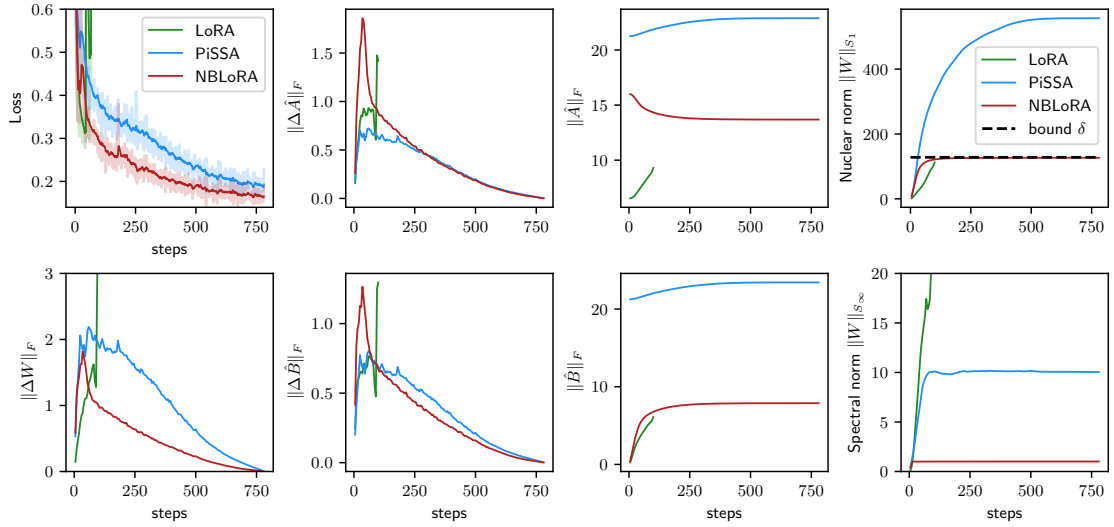

(b) Learning rate of 1e-3

Figure 1: Training dynamics for LoRA, PiSSA and NBLoRA two learning rates.

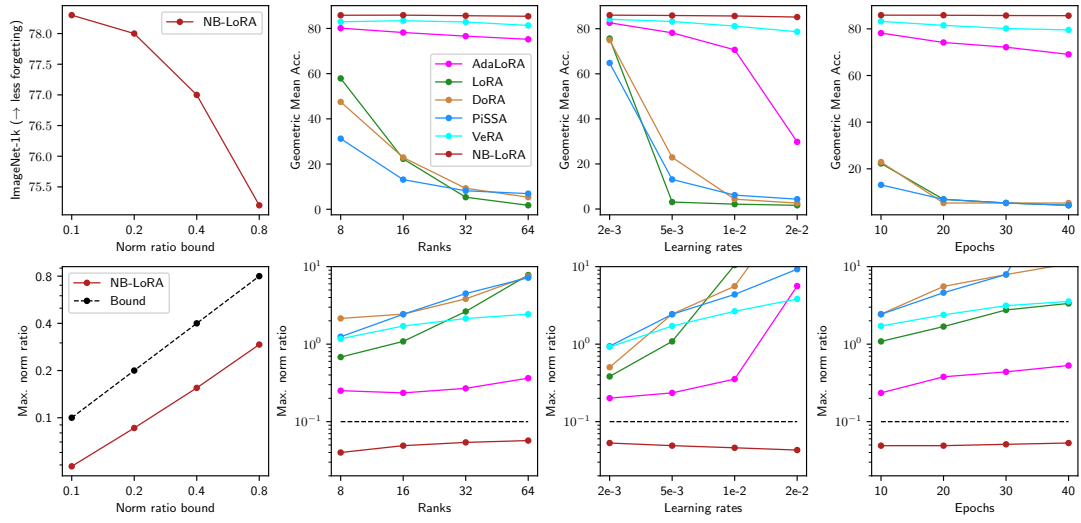

(a) SVHN

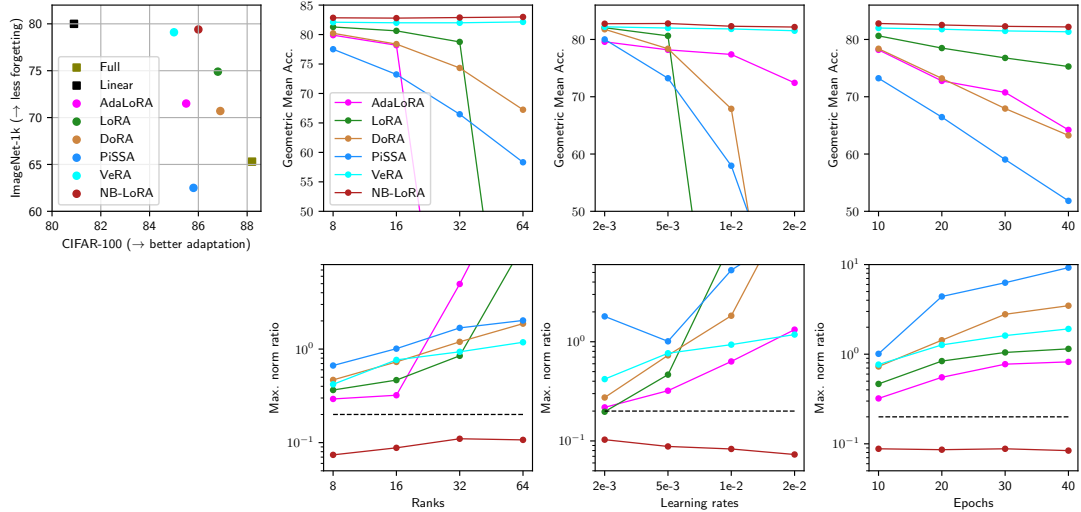

(b) CIFAR-100

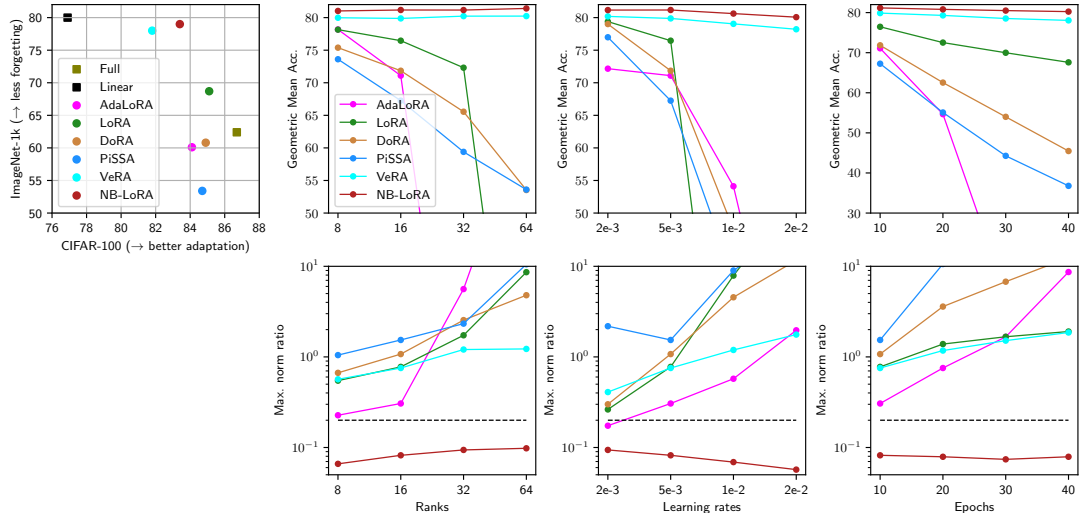

(c) Food-101

Figure 2: Geometric mean of source and target accuracies and norm-ratio of weight adapter with different adapters on various of hyper-parameter setup.

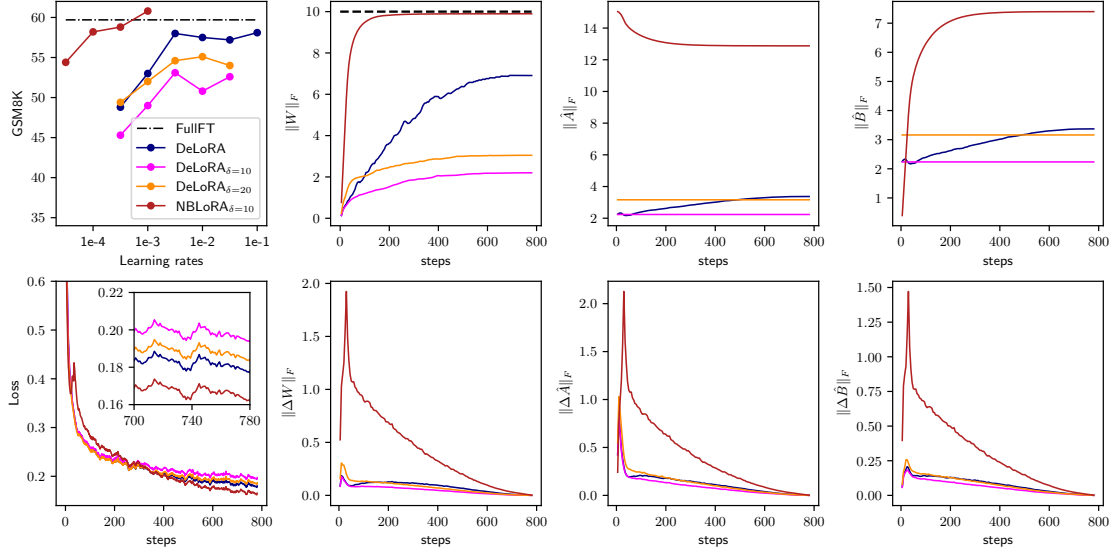

Figure 3: Training dynamics of NB-LoRA and DeLoRA. Note that Figure 4 of the paper reports matrix norms of DeLoRA ( $lr=1e-1$ ), DeLoRA $_{\delta=10}$  ( $lr=5e-2$ ) and DeLoRA $_{\delta=20}$  ( $lr=5e-2$ ), whereas the figure above shows the corresponding result under  $lr=5e-3$ .

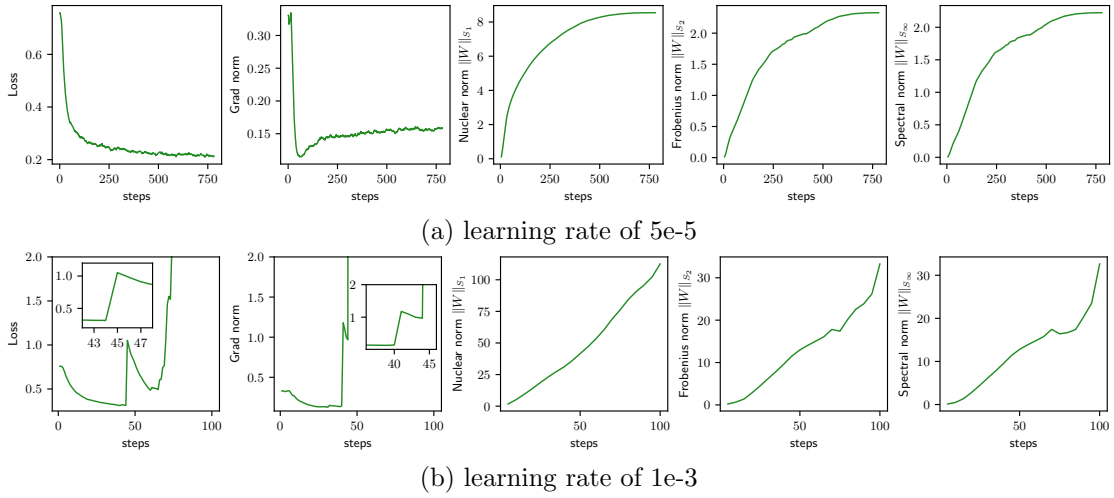

Figure 4: Training dynamics for LoRA under two learning rates
